# Supplementary material
Source: MDPI journal article supplement (https://www.mdpi.com/1996-1073/16/6/2750)
Supplement: s1 [file s1]

# Supplementary Materials

## Supplementary Notes

### 1. Relationship between PEA thickness and emitter temperature

To better understand the effect of PEA thicknesses on the temperature of underlying emitter, we simplified the thermal process as shown in **Figure. S3a**. A heat flux is driven by the temperature difference between ambient air and the emitter. The overall thermal resistance consists of thermal resistance  $\frac{D_{PEA}}{k_{PEA}}$  across the PEA and external thermal resistance  $\frac{1}{h_{ext}}$  between PEA and environment. Therefore, the heat flux  $q$  can be expressed as follows:

$$q = \frac{(T_{amb} - T_{emi})}{(\frac{D_{PEA}}{k_{PEA}} + \frac{1}{h_{ext}})} \quad (S1)$$

where  $T_{amb}$  is the ambient temperature,  $T_{emi}$  is the emitter temperature,  $D_{PEA}$  is the thickness of PEA,  $k_{PEA}$  is the thermal conductivity of PEA,  $h_{ext}$  is the convective heat transfer coefficient. The relationship between PEA transmittance and thickness according to Beer-Lambert Law is as follows:

$$\tau(\lambda) = e^{-\alpha \cdot D_{PEA}} \quad (S2)$$

where  $\tau(\lambda)$  is the transmittance of PEA,  $\alpha$  is extinction coefficient of PEA, which is obtained by measuring the transmittance of PEA samples. The results of measured  $\tau(\lambda)$  and calculated  $\alpha$  are shown in **Figure. S3b**. The heat transfer model of PEA+Emitter is shown in **Figure. S5b**. The energy conservation equation of emitter-PEA surface and PEA upper surface is as follows:

$$\tau_{amb} \tau(\lambda) \sigma (T_1^4 - T_{spa}^4) = k_{PEA} \frac{(T_2 - T_1)}{D_{PEA}} \quad (S3)$$

$$k_{PEA} \frac{(T_2 - T_1)}{D_{PEA}} = h_{ext}(T_0 - T_2) \quad (S4)$$

where  $\tau_{amb}$  is atmospheric transmittance;  $T_1$  is the temperature of emitter;  $T_2$  is the temperature of PEA;  $T_{spa}$  is the temperature of outer space, which temperature is 3 K. Through iterative calculation,  $T_1$  under different atmospheric transmittance  $\tau_{amb}$  and convective heat transfer coefficient  $h_{ext}$  is calculated, as shown in **Figure. S3c** and **Figure. S3d**, respectively.

## 2. The calculation of $P_{cool,net}$

The heat transfer model of PEA+Hydrogel, PEA+Emitter and P(VdF-HFP) samples in **Figure. 3a** is simplified as shown in **Figure. S5**. Due to the infrared transmittance of PEA, hydrogel/emitter placed in front of PEA can conduct heat transfer with outer space through PEA. Due to the low thermal conductivity of PEA, the temperature of the PEA+Hydrogel/PEA+Emitter interface is lower than that of the PEA-ambient interface. Therefore, the  $P_{cool,net}$  of PEA+Hydrogel can be expressed as follows:

$$P_{cool,net} = P_{rad} + P_{eva} - P_{sun} - P_{amb} \quad (S5)$$

Similarly, the  $P_{cool,net}$  of PEA+Emitter can be expressed as follows:

$$P_{cool,net} = P_{rad} - P_{sun} - P_{amb} \quad (S6)$$

Because of the high infrared emissivity of P(VdF-HFP), the interface of P(VdF-HFP) for radiative cooling is mainly the upper surface. The  $P_{cool,net}$  of P(VdF-HFP) can be expressed as follows:

$$P_{cool,net} = P_{rad} - P_{sun} - P_{amb} \quad (S7)$$

## Supplementary Figurers

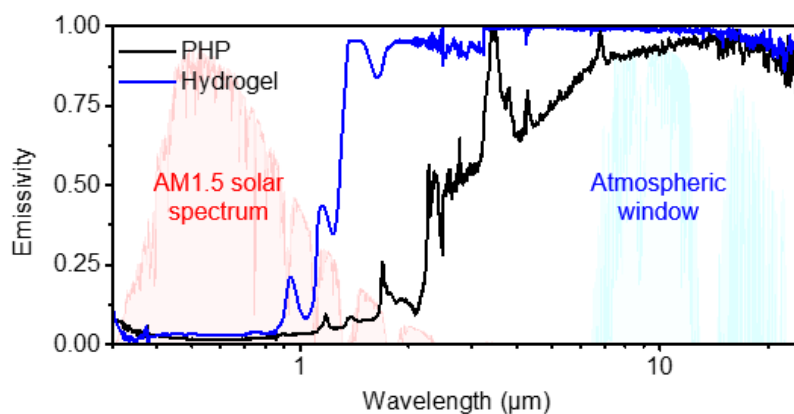

**Figure. S1:** Emissivity of PHP membrane and hydrogel sample along with the normalized AM 1.5 solar spectrum and the atmospheric transmittance

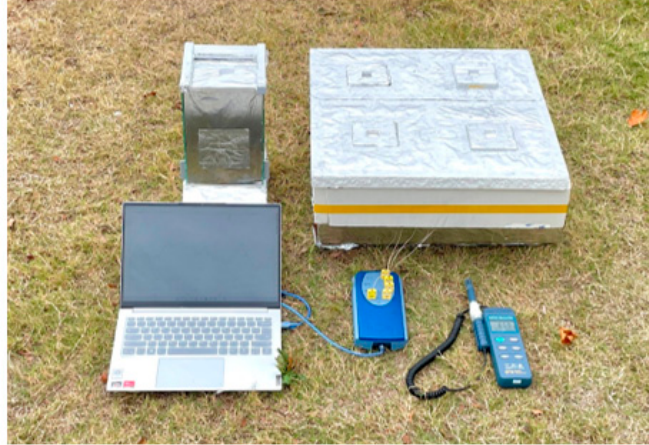

**Figure. S2:** Photograph of the cooling performance experimental setup

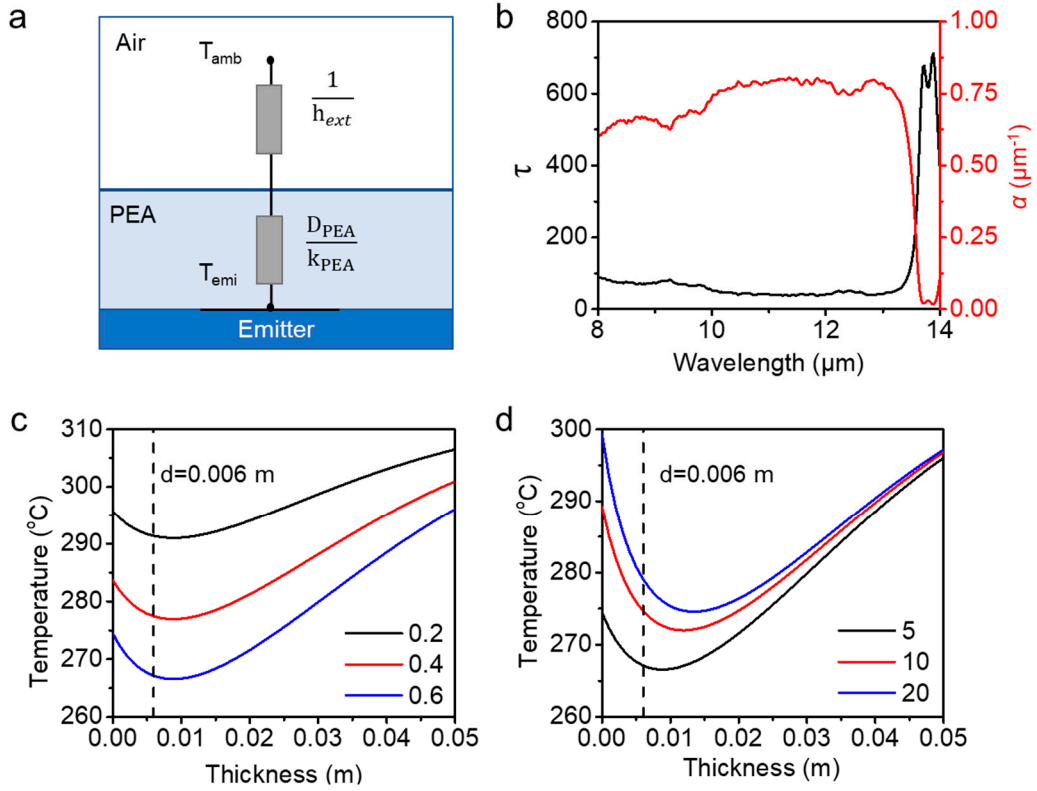

**Figure. S3:** Heat transfer model of PEA+Emitter sample with different thickness. **(a)** Resistance network of heat transfer between the emitter and ambient air. **(b)** Absorptivity and extinction coefficient of PEA samples in the atmospheric window. **(c-d)** Simulated variation of emitter temperature with PEA thickness in different atmospheric transmittance **(c)** and convective heat transfer coefficients **(d)**

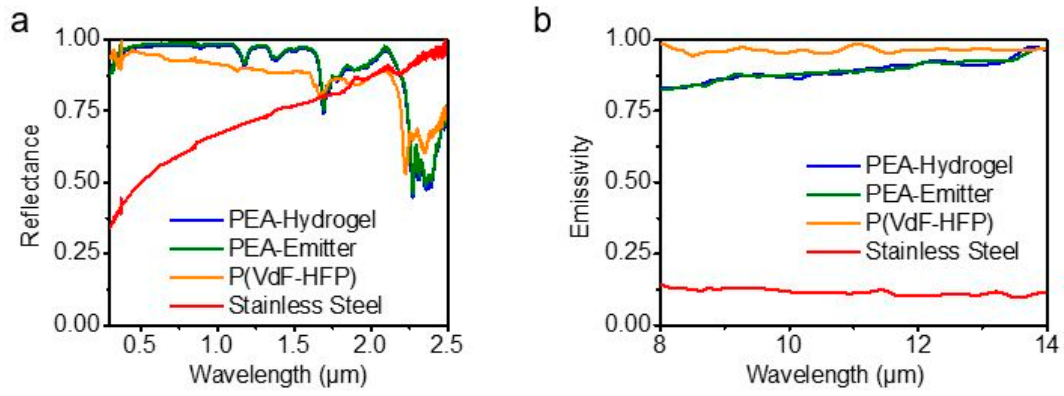

**Figure. S4:** Reflectance spectrum in the AM 1.5 solar spectrum range (a) and emissivity in the infrared range (b) of PEA+Hydrogel sample, PEA+Emitter sample, P(VdF-HFP) sample and stainless-steel substrate

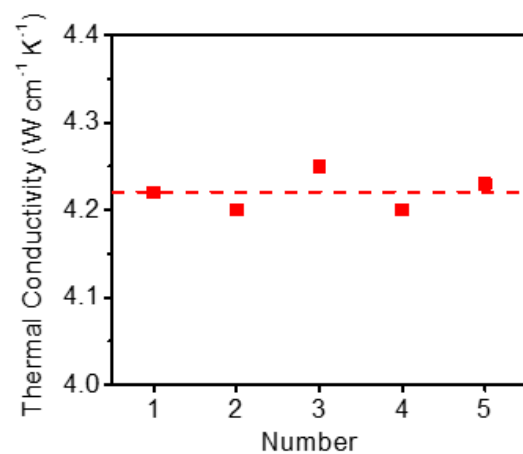

**Figure. S5:** Thermal conductivity measurement results of a P(VdF-HFP) sample in 5 times



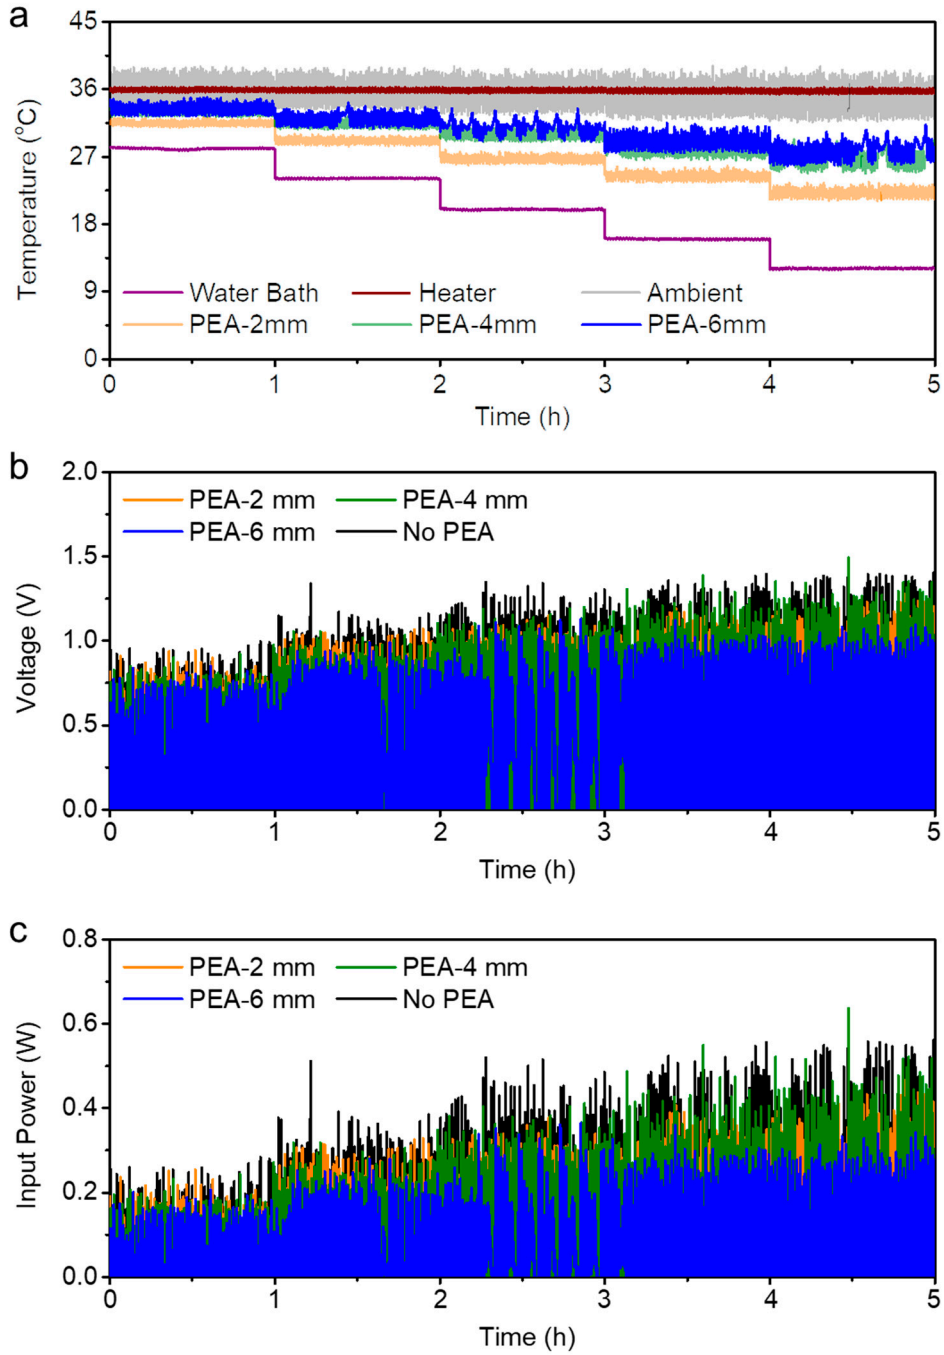

**Figure. S6:** Heat transfer experiment of PEA samples. **(a)** Temperatures recordings of different PEA thickness in different water bath temperatures. **(b)** Voltage that needs to be applied to the heater in order to maintain the same temperature with and without the PEA layer. **(c)** Corresponding input power of the heater calculated from its voltage and constant  $3.5 \, \Omega$  resistance

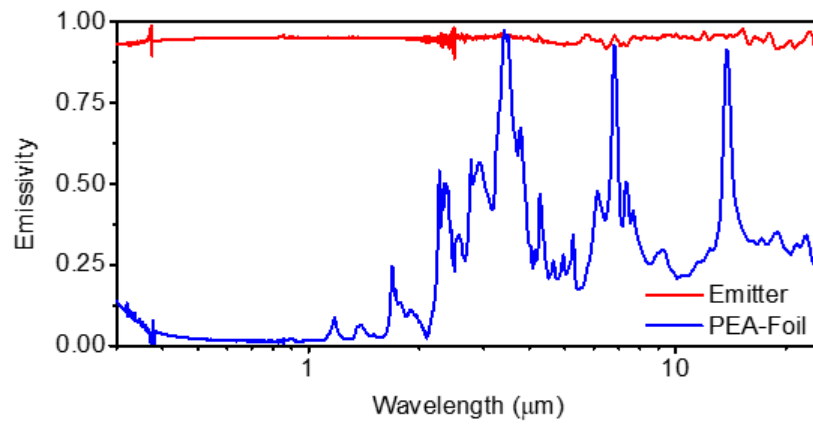

**Figure. S7:** Emissivity spectrum of emitter and PEA-Foil sample

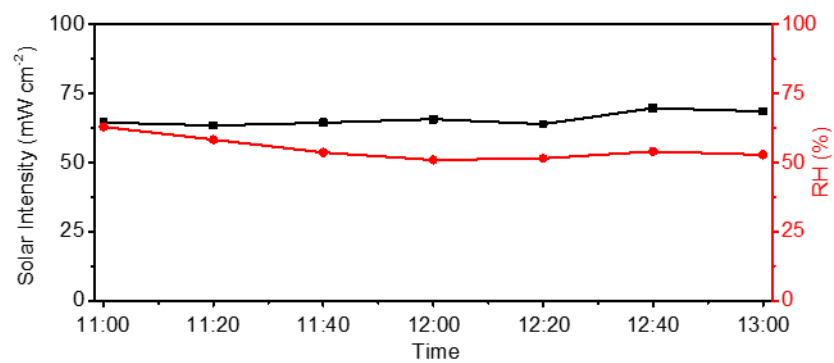

**Figure. S8:** Real-time solar intensity and environment humidity on Jul 7, 2022 in Wuhan, China
